# Supplementary material
Source: publisher site journal article supplement (https://www.dovepress.com/article/247757)

| **Supplemental Table 1.** Clinicopathologic Characteristics of FUSCC GC Patients With MSI-H vs MSI-L/MSS | | | |
| --- | --- | --- | --- |
| Characteristics | No. of Cases (%) | | |
|  | MSI-H | MSI-L/MSS | *P* Value |
| All Subjects | 15 (100) | 142 (100) |  |
| Age |  |  |  |
| <=60 | 2 (13.3) | 61 (43.0) | **0.042a)** |
| >60 | 13 (86.7) | 77 (54.2) |  |
| Missing | 0 (0.0) | 4 (2.8) |  |
| Sex |  |  |  |
| Female | 6 (40.0) | 38 (26.8) | 0.365a) |
| Male | 9 (60.0) | 103 (72.5) |  |
| Missing | 0 (0.0) | 1 (0.7) |  |
| Pathological types |  |  | 0.562a) |
| Mucinous adenocarcinoma | 0 (0.0) | 8 (5.6) |  |
| Signet ring cell carcinoma | 1 (6.7) | 5 (3.5) |  |
| Other stomach adenocarcinoma | 13 (86.7) | 118 (83.1) |  |
| Missing | 1 (6.7) | 11 (7.7) |  |
| T stage |  |  |  |
| T1-T2 | 8 (53.3) | 47 (33.1) | 0.209a) |
| T3-T4 | 7 (46.7) | 94 (66.2) |  |
| Missing | 0 (0.0) | 1 (0.7) |  |
| N stage |  |  |  |
| N negative | 4 (26.7) | 26 (18.3) | 0.491a) |
| N positive | 11 (73.3) | 115 (81.0) |  |
| Missing | 0 (0.0) | 1 (0.7) |  |
| M stage |  |  |  |
| M0 | 14 (93.3) | 138 (97.2) | 0.335a) |
| M1 | 1 (6.7) | 3 (2.1) |  |
| Missing | 0 (0.0) | 1 (0.7) |  |
| TNM stage |  |  |  |
| Stage I-II | 8 (53.3) | 58 (40.9) | 0.526a) |
| Stage III-IV | 7 (46.7) | 83 (58.5) |  |
| Missing | 0 (0.0) | 1 (0.7) |  |
| **Abbreviations:** TCGA, The Cancer Genome Atlas; GC, gastric cancer; MSI-H, microsatellite instability-high; MSI-L: microsatellite instability-low; MSS: microsatellite stable. The results were in **bold**, if the *P* value was less than 0.05.  a) Excluding those with missing data. | | | |

| **Supplemental Table 2.** Clinicopathological features in *ACVR2A* mutated and wild-type groups of FUSCC GC patients | | | |
| --- | --- | --- | --- |
| Characteristics | No. of Cases (%) | | |
|  | Mutated *ACVR2A* | Wild-type *ACVR2A* | *P* value |
| All subjects | 10 (100) | 147 (100) |  |
| Age |  |  | 0.526a) |
| <=60 | 3 (30.0) | 60 (40.8) |  |
| >60 | 7 (70.0) | 83 (56.5) |  |
| Missing | 0 (0.0) | 4 (2.7) |  |
| Sex |  |  | 1.000a) |
| Male | 7 (70.0) | 105 (71.4) |  |
| Female | 3 (30.0) | 41 (27.9) |  |
| Missing | 0 (0.0) | 1 (0.7) |  |
| Pathological types |  |  | 0.421a) |
| Mucinous adenocarcinoma | 0 (0.0) | 8 (5.4) |  |
| Signet ring cell carcinoma | 1 (10.0) | 5 (3.4) |  |
| Other stomach adenocarcinoma | 9 (90.0) | 122 (83.0) |  |
| Missing | 0 (0.0) | 12 (8.2) |  |
| T stage |  |  | 0.730a) |
| T1-T2 | 4 (40.0) | 47 (32.0) |  |
| T3-T4 | 6 (60.0) | 99 (67.4) |  |
| Missing | 0 (0.0) | 1 (0.7) |  |
| N stage |  |  | 0.406a) |
| N negative | 3 (30.0) | 27 (18.4) |  |
| N positive | 7 (70.0) | 119 (81.0) |  |
| Missing | 0 (0.0) | 1 (0.7) |  |
| M stage |  |  | 0.235a) |
| M0 | 9 (90.0) | 143 (97.3) |  |
| M1 | 1 (10.0) | 3 (2.0) |  |
| Missing | 0 (0.0) | 1 (0.7) |  |
| TNM stage |  |  | 0.744a) |
| Stage I-II | 5 (50.0) | 61 (41.5) |  |
| Stage III-IV | 5 50.0) | 85 (57.8) |  |
| Missing | 0 (0.0) | 1 (0.7) |  |
| Mean of TMB ± SD | 26.3 (16) | 1.3 (4.5) | **<0.001** |
| **Abbreviations:** ACVR2A, activin A receptor type 2A; TCGA, The Cancer Genome Atlas; GC, gastric cancer; GEJ, Gastroesophageal Junction; SD, standard deviation; and TMB: tumour mutation burden. The results were in **bold**, if the *P* value was less than 0.05. | | | |
| a) Excluding those with missing data. | | | |

| **Supplemental Table 3**. Mutation information of ten *ACVR2A* mutated patients in our sequenced samples. | | | | |
| --- | --- | --- | --- | --- |
| Patient Number | Variant Classification | Variant Type | Protein Change | MSI Status |
| 1 | 3'UTR/3'UTR/3'UTR | SNP/DEL/DEL | none | MSI-H |
| 2 | Silent/3'UTR/3'UTR | SNP/SNP/INS | none | MSI-H |
| 3 | Silent | SNP | none | MSI-H |
| 4 | Frame_Shift_Del/Frame_  Shift_Del/3'UTR | DEL/DEL/DEL | D96Tfs*54 | MSI-H |
| 5 | Frame_Shift_Del | DEL | K437Rfs*5 | MSI-H |
| 6 | Missense_Mutation | SNP | H291N | MSS |
| 7 | Intron | SNP | none | MSS |
| 8 | 3'UTR/3'UTR | SNP/DEL | none | MSI-H |
| 9 | 3'UTR | DEL | none | MSI-H |
| 10 | Frame_Shift_Del | DEL | K437Rfs*5 | MSI-H |
| **Abbreviations:** ACVR2A: Activin A Receptor Type 2A; 3'UTR: 3' untranslated region; SNP: single nucleotide polymorphism; DEL: deletion; MSI-H: microsatellite instability high; MSS: microsatellite stable | | | | |

**Supplemental figure 1:** Cell lines used in our study do not mutate in two A8 tracts of *ACVR2A* coding sequence.


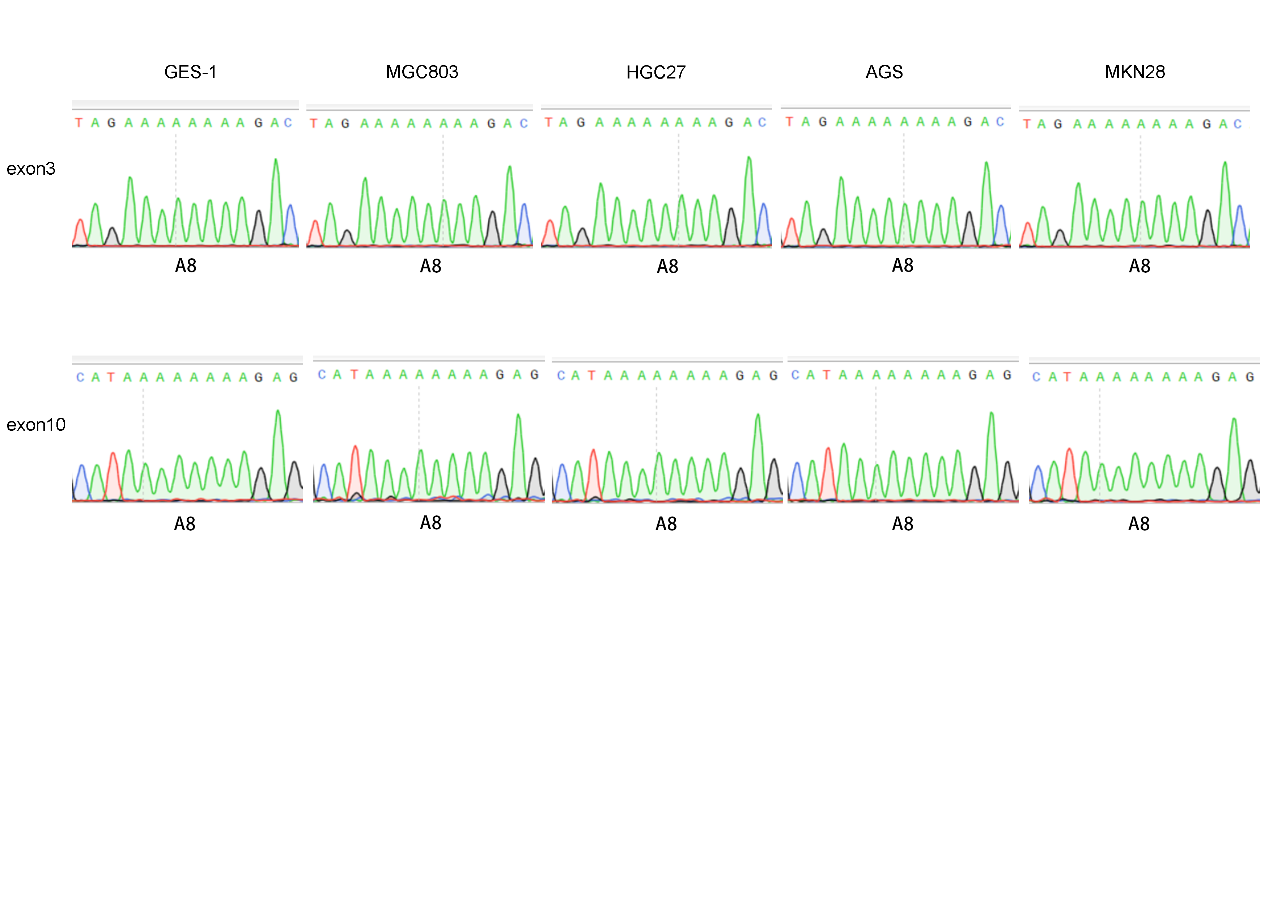

Supplement: Supplementary file 1 [file get_supplementary_file.php]
